# Supplementary material for: MgI2-accelerated enantioselective Morita–Baylis–Hillman reactions of cyclopentenone utilizing a chiral DMAP catalyst
Source: Royal Society of Chemistry journal article supplement (doi:10.1039/c001977a), 2010-01-01

## MgI<sub>2</sub>-Accelerated Enantioselective Morita–Baylis–Hillman Reactions of Cyclopentenone Utilizing a Chiral DMAP Catalyst

**Alejandro Bugarin and Brian T. Connell\***

*Department of Chemistry, Texas A&M University,  
PO Box 30012, College Station, TX 77842-3012*

*connell@chem.tamu.edu*

### Table of Contents

|                                                      |     |
|------------------------------------------------------|-----|
| General Information .....                            | S-1 |
| References to Known Compounds .....                  | S-2 |
| HPLC Data .....                                      | S-3 |
| Procedures and Characterization Data .....           | S-4 |
| <sup>1</sup> H and <sup>13</sup> C NMR Spectra ..... | S-6 |

### General Information

All reactions were carried out under an argon atmosphere in oven-dried glassware with magnetic stirring. All commercially obtained reagents were used as received. All aldehydes were distilled before use. Isopropanol was distilled from Na<sup>0</sup>.

Heating was accomplished by either a heating mantle or silicone oil bath. Purification of reaction products was carried out by flash column chromatography using silica gel 60 (230-400 mesh). TLC visualization was accompanied with UV light and/or ceric ammonium molybdate staining. Concentration in vacuo refers to the removal of volatile solvent using a rotary evaporator attached to a dry diaphragm pump (10-15 mm Hg) followed by pumping to a constant weight with an oil pump (<300 mTorr).

<sup>1</sup>H NMR spectra were recorded at 300 MHz, and are reported relative to CDCl<sub>3</sub> (δ 7.27). <sup>1</sup>H NMR coupling constants (J) are reported in Hertz (Hz) and multiplicities are indicated as follows: s (singlet), d (doublet), t (triplet), m (multiplet). Proton-decoupled <sup>13</sup>C NMR spectra were recorded at 75 MHz and reported relative to CDCl<sub>3</sub> (δ 77).

### References to Known Compounds

| Compound No. | Product                                                                           | Reference (racemic) | Reference (nonracemic) | Compound No. | Product                                                                            | Reference (racemic) | Reference (nonracemic) |
|--------------|-----------------------------------------------------------------------------------|---------------------|------------------------|--------------|------------------------------------------------------------------------------------|---------------------|------------------------|
| 1            | 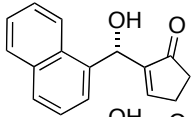 | –                   | –                      | 6            |  | 2                   | –                      |
| 2            |  | 1                   | –                      | 7            |  | 1                   | 8                      |
| 3            |  | 2                   | 6                      | 8            |  | 4                   | 7                      |
| 4            |  | 3                   | 7                      | 9            |  | 5                   | 7                      |
| 5            |  | 1                   | –                      | 10           |  | 5                   | 7                      |

[1] S. Luo, X. Mi, H. Xu, P. G. Wang, J. P. Cheng, *J. Org. Chem.* **2004**, *69*, 8413-8422.

[2] S. Luo, B. Zhang, J. He, A. Janczuk, J.-P. Cheng, *Tetrahedron Lett.* **2002**, *43*, 7369-7371.

[3] W. Pei, H.-X. Wei, G. Li, *Chem. Commun.* **2002**, 2412-2413.

[4] DE Patent 102004044250 A1, **2006**.

[5] H. Ito, Y. Takenaka, S. Fukunishi, K. Iguchi, *Synthesis* **2005**, *18*, 3035-3038.

[6] N. T. MacDougall, W. L. Trevellini, S. A. Rodgen, L. T. Kliman S. E. Schaus, *Adv. Synth. Catal.* **2004**, *346*, 1231-1240.

[7] K. Matsui, S. Takizawa, H. Sasai, *Tetrahedron Lett.* **2005**, *46*, 1943-1946.

[8] M. Shi, X.-G. Liu, *Org. Lett.* **2008**, *10*, 1043-1046.

For data on all racemic adducts, also see: A. Bugarin, B. T. Connell, *J. Org. Chem.* **2009**, *74*, 4638-4641.

### HPLC Data

| Entry          | Product                                                                           | HPLC RT                                            | % ee | $[\alpha]_D^{22\ d}$ | Entry           | Product                                                                            | HPLC RT                                            | % ee | $[\alpha]_D^{22\ d}$ |
|----------------|-----------------------------------------------------------------------------------|----------------------------------------------------|------|----------------------|-----------------|------------------------------------------------------------------------------------|----------------------------------------------------|------|----------------------|
| 1 <sup>a</sup> | 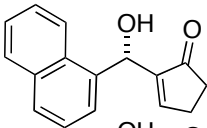 | $t_{major}$ = 30.60 min<br>$t_{minor}$ = 27.25 min | 98   | +66.1                | 6 <sup>c</sup>  |  | $t_{major}$ = 17.61 min<br>$t_{minor}$ = 20.33 min | 89   | +17.3                |
| 2 <sup>b</sup> |  | $t_{major}$ = 22.23 min<br>$t_{minor}$ = 24.29 min | 95   | +26.7                | 7 <sup>b</sup>  |  | $t_{major}$ = 21.45 min<br>$t_{minor}$ = 24.70 min | 89   | +38.5                |
| 3 <sup>a</sup> |  | $t_{major}$ = 23.67 min<br>$t_{minor}$ = 26.64 min | 94   | -22.7                | 8 <sup>c</sup>  |  | $t_{major}$ = 8.79 min<br>$t_{minor}$ = 9.19 min   | 63   | -25.4                |
| 4 <sup>b</sup> |  | $t_{major}$ = 12.39 min<br>$t_{minor}$ = 13.49 min | 94   | +18.2                | 9 <sup>c</sup>  |  | $t_{major}$ = 7.94 min<br>$t_{minor}$ = 8.51 min   | 58   | -21.7                |
| 5 <sup>c</sup> |  | $t_{major}$ = 24.68 min<br>$t_{minor}$ = 25.94 min | 92   | +15.8                | 10 <sup>b</sup> |  | $t_{major}$ = 10.47 min<br>$t_{minor}$ = 10.83 min | 53   | -18.9                |

<sup>a</sup> Enantiomeric excess was determined by HPLC with a Chiralcel OJ-H column (hexane/*i*PrOH = 90/10), 1.0 mL/min, 254 nm.

<sup>b</sup> Enantiomeric excess was determined by HPLC with a Chiralcel OJ-H column (hexane/*i*PrOH = 85/15), 1.0 mL/min, 254 nm.

<sup>c</sup> Enantiomeric excess was determined by HPLC with a Chiralcel OJ-H column (hexane/*i*PrOH = 95/5), 1.0 mL/min, 254 nm.

<sup>d</sup> Optical rotation at (*c* 1.00, CHCl<sub>3</sub>).

The absolute (*S*) configuration of products **3**, **4**, **7**, **8**, **9** and **10** was determined by comparison of the sign of optical rotation with the known compounds.<sup>[6-8]</sup> Other absolute configurations are assigned by analogy.

## Procedures and Characterization Data

Compounds **2-10**, are known compounds. Compound **1** is a new compound. Full tabulated data is available below for adduct of the optimization reaction (compound **3**) and the new compound **1**.

**General method for the asymmetric MBH reaction:** To a stirred mixture of (*R*)-(+)-4-dimethylaminopyrindinyl(pentaphenylcyclopentadienyl)iron (**II**) (5 mg, 0.0075 mmol, 10 mol%), MgI<sub>2</sub> (10 mg, 0.038 mmol, 50 mol%) in *i*-PrOH (1.5 mL) was added the aldehyde (0.075 mmol) at room temperature under argon. Then the reaction mixture was cooled down to −20 °C followed by the addition of cyclopent-2-enone (9 mg, 0.11 mmol, 1.5 equiv). After, the mixture was stirred for 24 h at −20 °C under argon atmosphere. The reaction was quenched by addition of saturated aqueous NH<sub>4</sub>Cl solution (1.0 mL). The solution mixture was extracted twice with CH<sub>2</sub>Cl<sub>2</sub> (5 mL) and dried over anhydrous Na<sub>2</sub>SO<sub>4</sub>. The solvent was removed under reduced pressure, and the residue was purified by flash silica gel column chromatography (20% EtOH/hexanes or CH<sub>2</sub>Cl<sub>2</sub>).

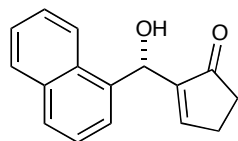

**(*S*)-2-(hydroxy(naphthalen-1-yl)methyl)cyclopent-2-enone (**1**):** To a stirred mixture of (*R*)-(+)-4-dimethylaminopyrindinyl(pentaphenylcyclopentadienyl) iron (**II**) (5 mg, 0.008 mmol), MgI<sub>2</sub> (10.4 mg, 0.038 mmol) in *i*-PrOH (1.5 mL) was added 1-naphthaldehyde (12 mg, 0.075 mmol) at room temperature under an argon atmosphere. Then the reaction mixture was cooled down to −20 °C followed by the addition of cyclopent-2-enone (9 mg, 0.11 mmol, 1.5 equiv). After, the mixture was stirred for 24 h at −20 °C under argon atmosphere. The reaction was quenched by addition of saturated aqueous NH<sub>4</sub>Cl (1 mL). The mixture was extracted twice with CH<sub>2</sub>Cl<sub>2</sub> (5 mL) and dried over anhydrous Na<sub>2</sub>SO<sub>4</sub>. The solvent was removed under reduced pressure, and the residue was purified by flash silica gel column chromatography to give compound **1** (14 mg, 94%) as a colorless oil (CH<sub>2</sub>Cl<sub>2</sub>); IR (thin film)  $\nu$  3403, 3028, 2920, 1695, 1611, 960 cm<sup>−1</sup>; <sup>1</sup>H NMR (CDCl<sub>3</sub>, 300 MHz)  $\delta$  7.93-7.88 (m, 2H), 7.82 (d, *J* = 8.7 Hz, 1H), 7.76 (d, *J* = 7.2 Hz, 1H), 7.70-7.46 (m, 3H), 7.02 (m, 1H), 6.30 (s, 1H), 3.79 (s, 1OH), 2.50 (m, 4H). <sup>13</sup>C NMR (75 MHz, CDCl<sub>3</sub>)  $\delta$  210.1, 161.1, 147.2, 136.6, 133.8, 130.4, 128.8, 128.4, 126.1, 125.6, 125.5, 124.4, 123.7, 66.5, 35.2, 26.6. HRMS (ESI) calcd for C<sub>16</sub>H<sub>14</sub>O<sub>2</sub> + Li requires *m/z* 245.040, found 245.041. [ $\alpha$ ]<sub>D</sub><sup>22</sup> = +66.09 (*c* 1.0, CHCl<sub>3</sub>). Enantiomeric excess was determined by HPLC with a Chiralcel OJ-H column (hexane/*i*PrOH = 90/10), 1.0 mL/min, 254 nm, *t*<sub>major</sub> = 30.60 min, *t*<sub>minor</sub> = 27.25 min; 98% *ee*.

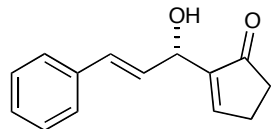

**(*S,E*)-2-(1-hydroxy-3-phenylallyl)cyclopent-2-enone (**3**):** To a stirred mixture of (*R*)-(+)-4-dimethylaminopyrindinyl(pentaphenylcyclopentadienyl) iron (**II**) (5 mg, 0.0075 mmol, 10 mol%), MgI<sub>2</sub> (10 mg, 0.038 mmol, 50 mol%) in *i*-PrOH (1.5 mL) was added *trans*-cinnamaldehyde (10 mg, 0.075 mmol) at room temperature under an argon atmosphere. Then the reaction mixture was cooled down to −20 °C followed by the addition of cyclopent-2-enone (9 mg, 0.11 mmol, 1.5 equiv). After, the mixture was stirred for 24 h at −20 °C under an argon atmosphere. The reaction was quenched by addition of saturated aqueous NH<sub>4</sub>Cl (1 mL). The solution mixture was extracted twice with CH<sub>2</sub>Cl<sub>2</sub> (5 mL) and dried over anhydrous Na<sub>2</sub>SO<sub>4</sub>. The solvent was removed under reduced pressure, and the residue was

*Supplementary Information*

S-5

purified by flash silica gel column chromatography to give compound **3** (16 mg, 96%) as a colorless oil (CH<sub>2</sub>Cl<sub>2</sub>); IR (thin film)  $\nu$  3400, 3026, 2921, 1691, 1605, 970 cm<sup>-1</sup>; <sup>1</sup>H NMR (CDCl<sub>3</sub>, 300 MHz)  $\delta$  7.55 (td,  $J$  = 1.1 Hz, 1.4 Hz, 3.1 Hz, 1H), 7.41 (m, 2H), 7.27-7.17 (m, 3H), 6.70 (dd,  $J$  = 1.1 Hz, 14.8 Hz, 1H), 6.35 (dd,  $J$  = 6.5 Hz, 9.8 Hz, 1H), 5.17 (d,  $J$  = 6.7 Hz, 1H), 3.31 (d,  $J$  = 4.1 Hz, 1OH), 2.65 (m, 2H), 2.49 (m, 2H). <sup>13</sup>C NMR (75 MHz, CDCl<sub>3</sub>)  $\delta$  209.6, 158.8, 146.3, 136.3, 131.1, 128.6, 128.5, 127.8, 126.5, 68.4, 35.1, 26.7. HRMS (ESI) calcd for C<sub>14</sub>H<sub>14</sub>O<sub>2</sub> + Li requires  $m/z$  221.115, found 221.114.  $[\alpha]_D^{22}$  = -22.66 ( $c$  1.0, CHCl<sub>3</sub>). Enantiomeric excess was determined by HPLC with a Chiralcel OJ-H column (hexane/*i*-PrOH = 90/10), 1.0 mL/min, 254 nm,  $t_{major}$  = 23.67 min,  $t_{minor}$  = 26.64 min; 94% *ee*.

# $^1\text{H}$ and $^{13}\text{C}$ NMR Spectra

$^1\text{H}$  NMR ( $\text{CDCl}_3$ , 300 MHz)

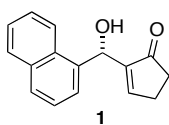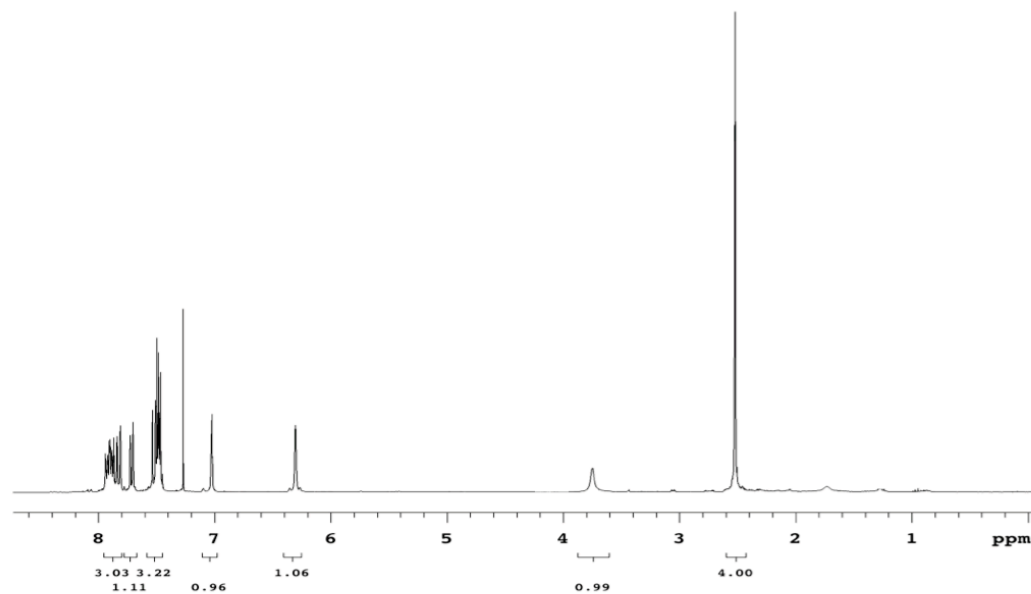

$^{13}\text{C}$  NMR ( $\text{CDCl}_3$ , 75 MHz)

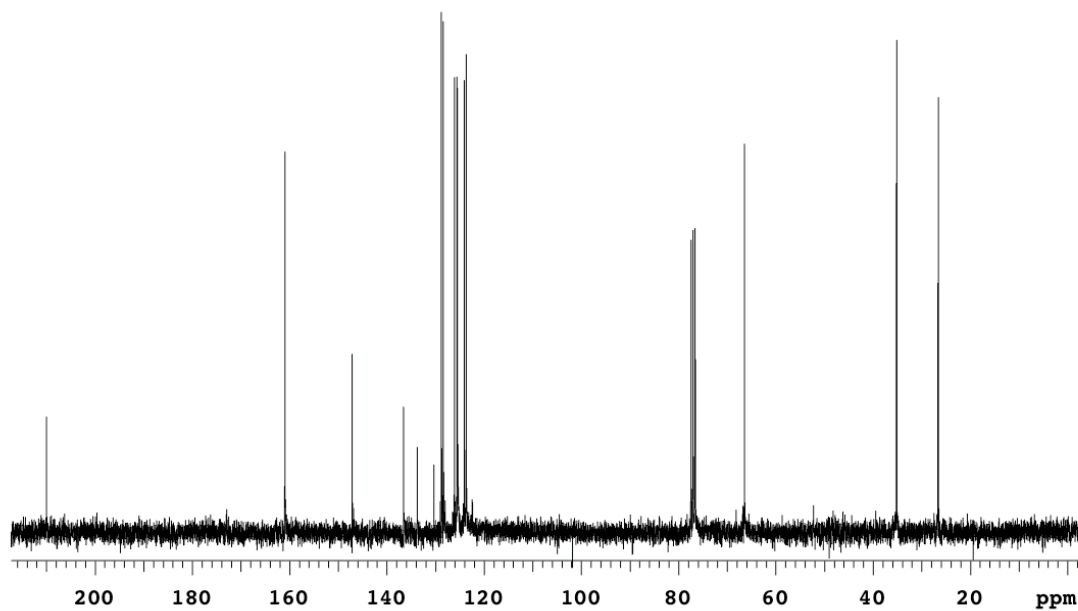

$^1\text{H}$  NMR ( $\text{CDCl}_3$ , 300 MHz)

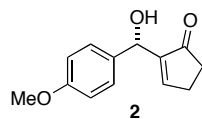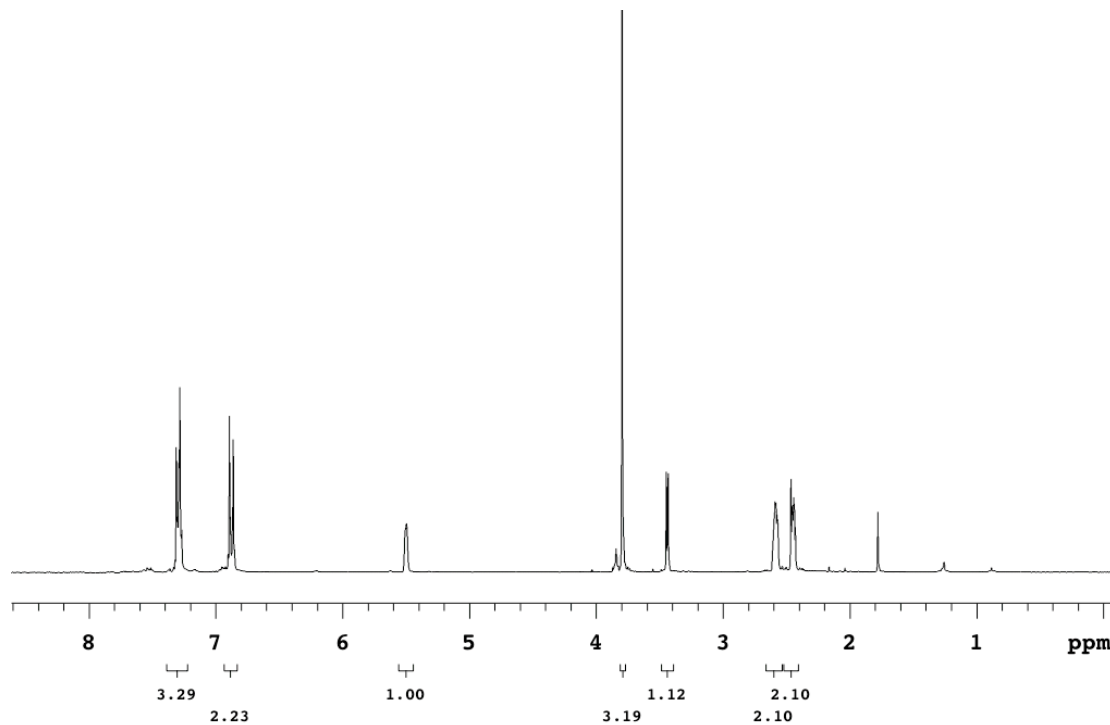

$^{13}\text{C}$  NMR ( $\text{CDCl}_3$ , 75 MHz)

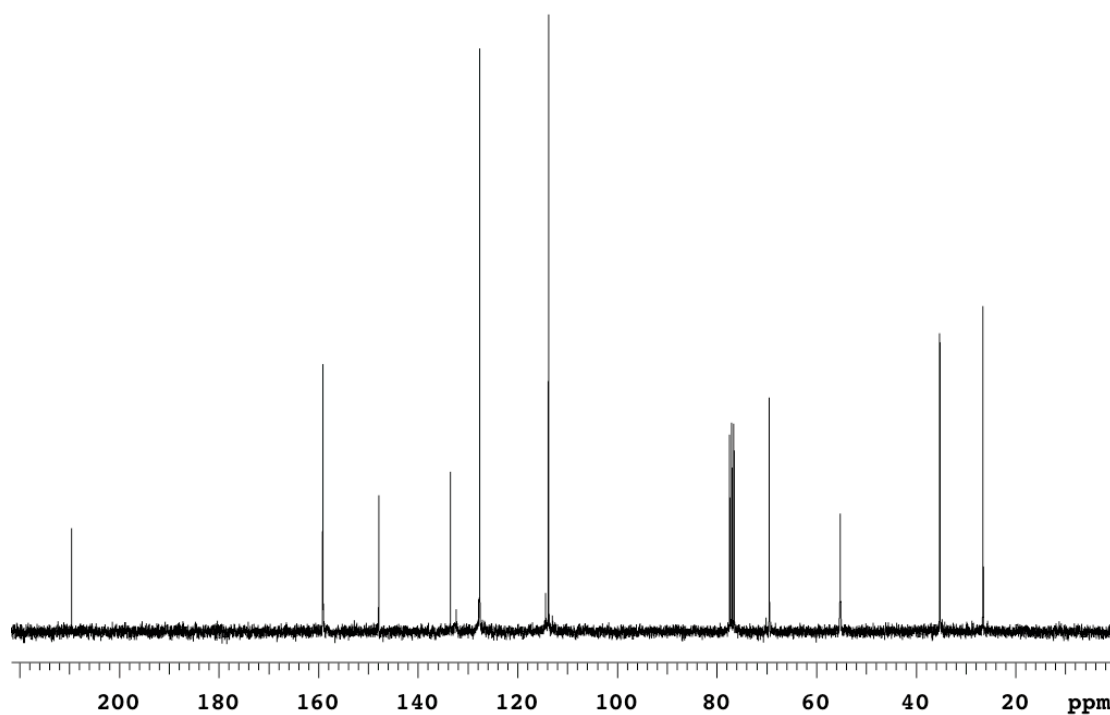

$^1\text{H}$  NMR ( $\text{CDCl}_3$ , 300 MHz)

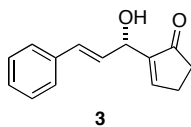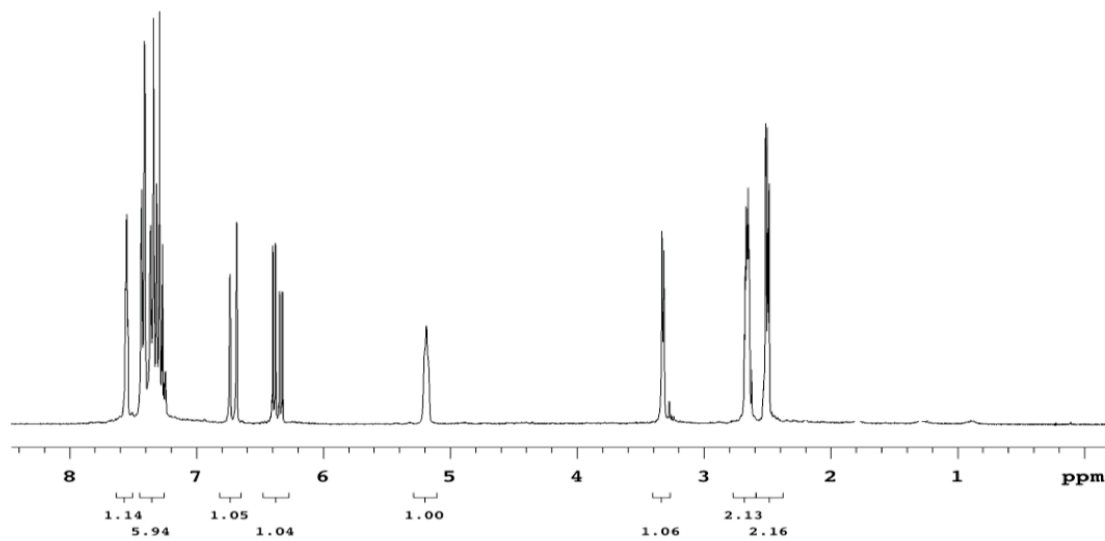

$^{13}\text{C}$  NMR ( $\text{CDCl}_3$ , 75 MHz)

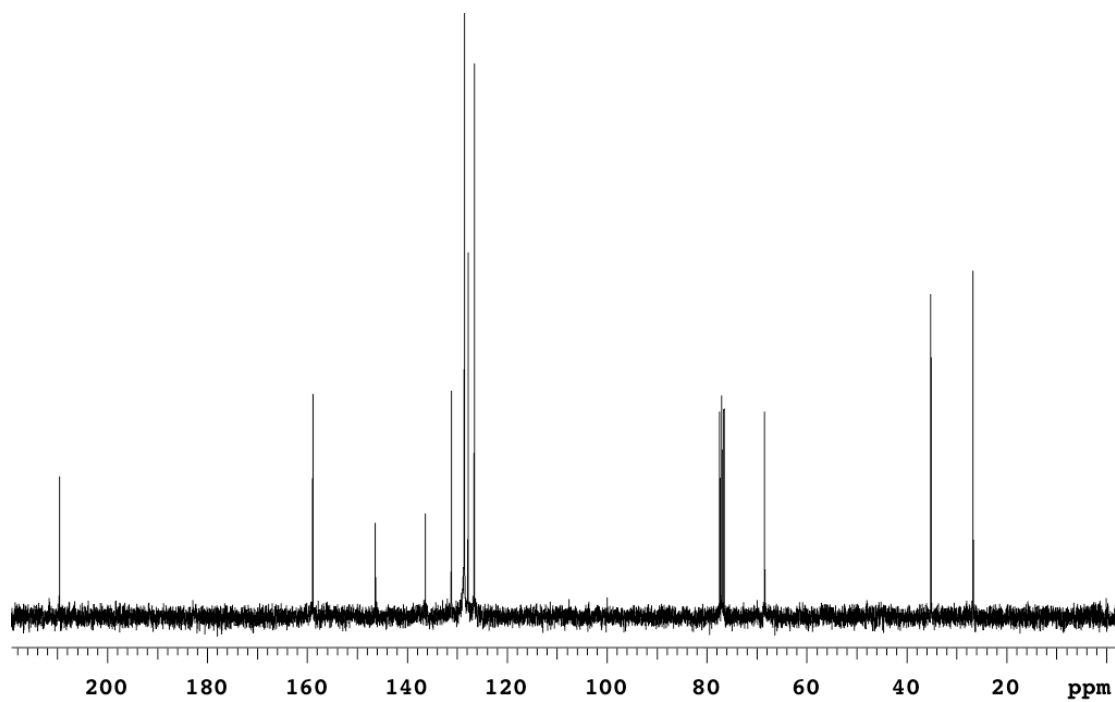



Supplementary Information

S-9

$^1\text{H}$  NMR ( $\text{CDCl}_3$ , 300 MHz)

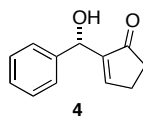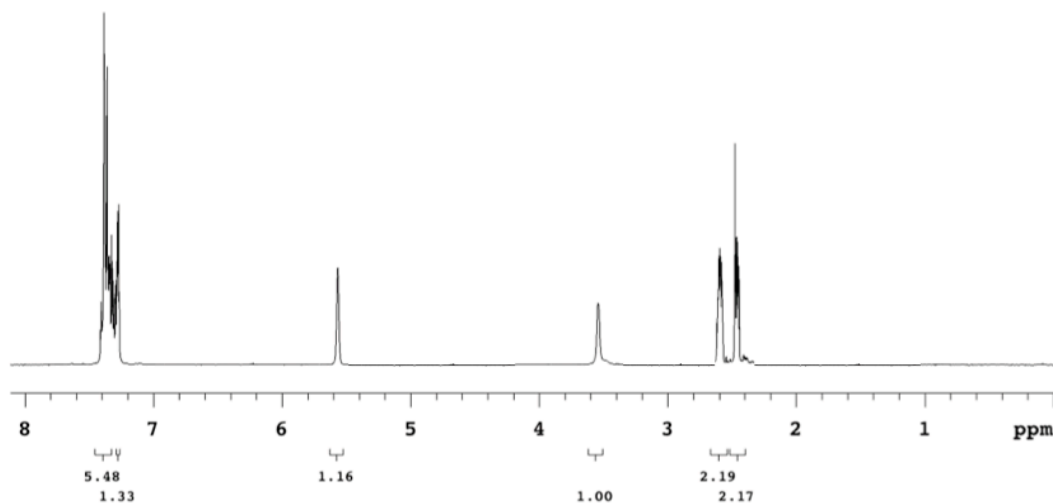

$^{13}\text{C}$  NMR ( $\text{CDCl}_3$ , 75 MHz)

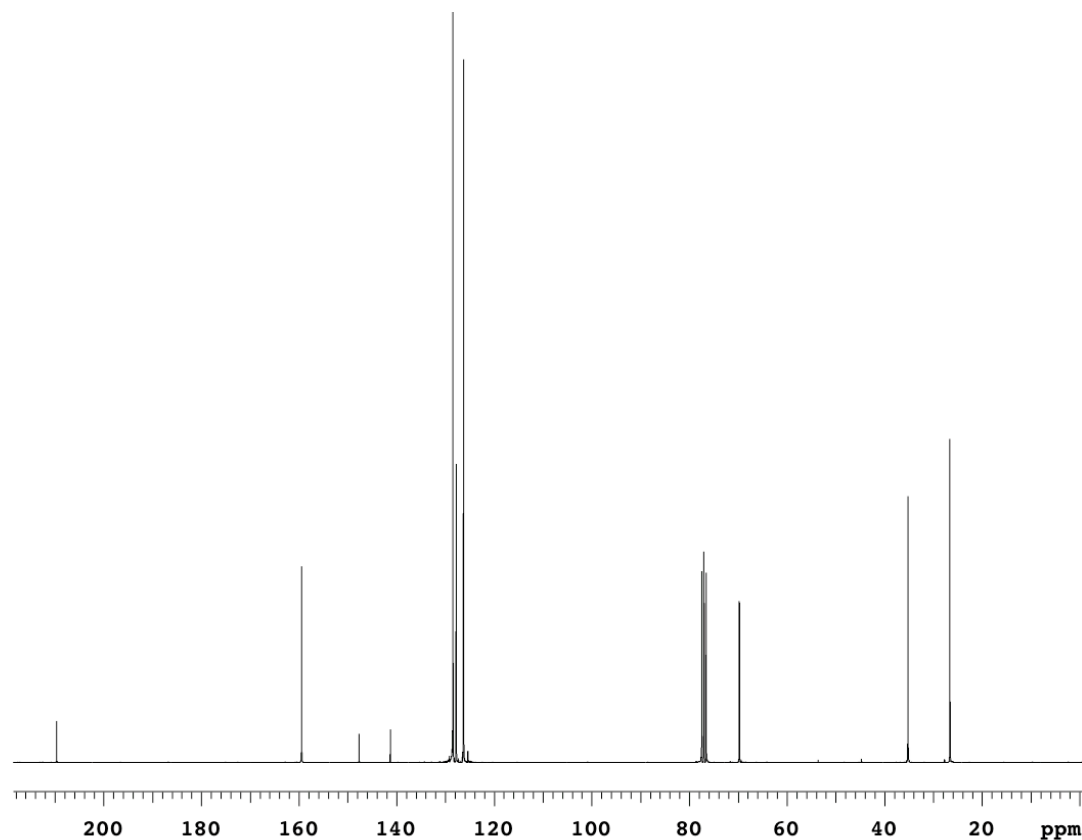

Supplementary Information

S-10

$^1\text{H}$  NMR ( $\text{CDCl}_3$ , 300 MHz)

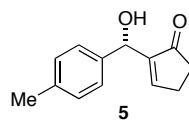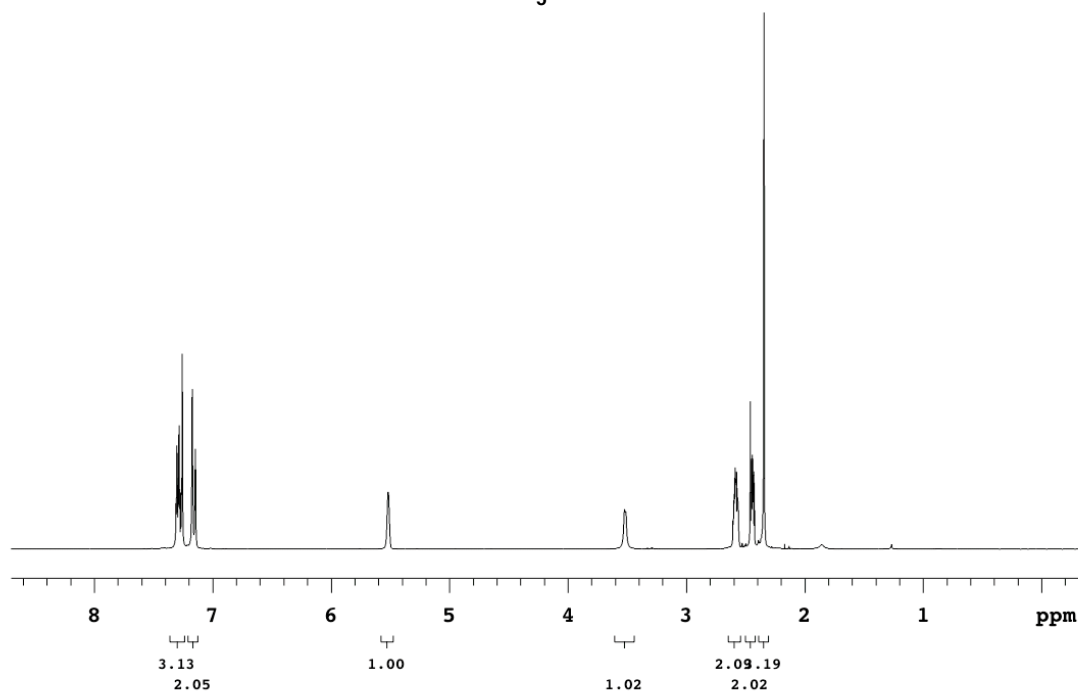

$^{13}\text{C}$  NMR ( $\text{CDCl}_3$ , 75 MHz)

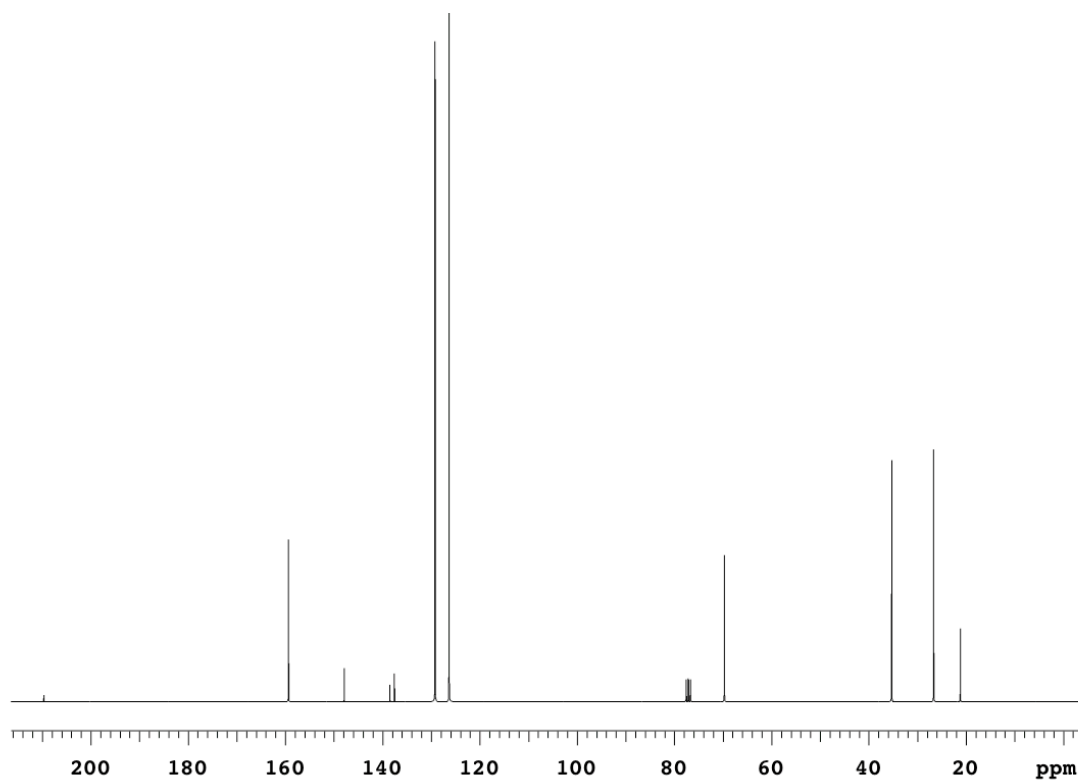

Supplementary Information  
<sup>1</sup>H NMR (CDCl<sub>3</sub>, 300 MHz)

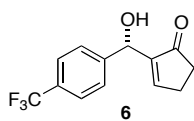

S-11

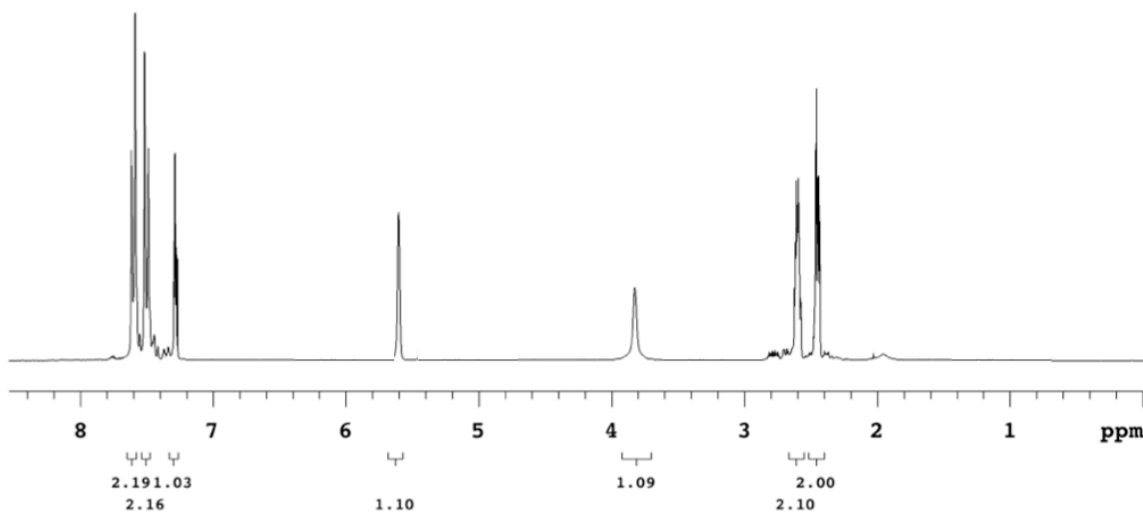

<sup>13</sup>C NMR (CDCl<sub>3</sub>, 75 MHz)

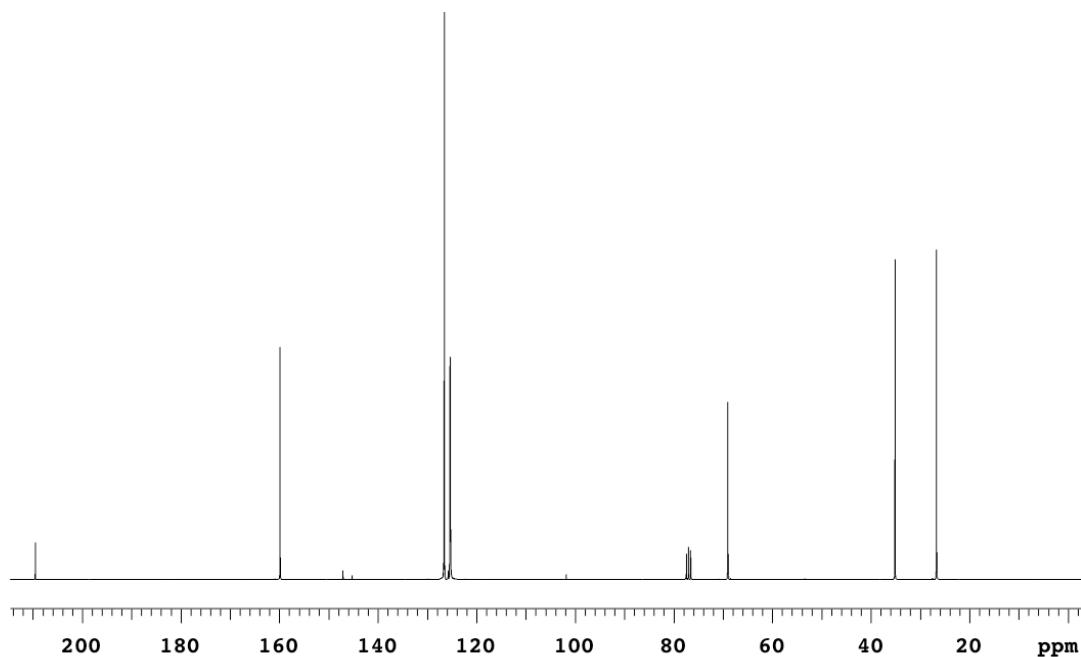

Supplementary Information

S-12

$^1\text{H}$  NMR ( $\text{CDCl}_3$ , 300 MHz)

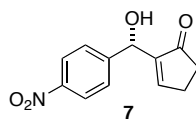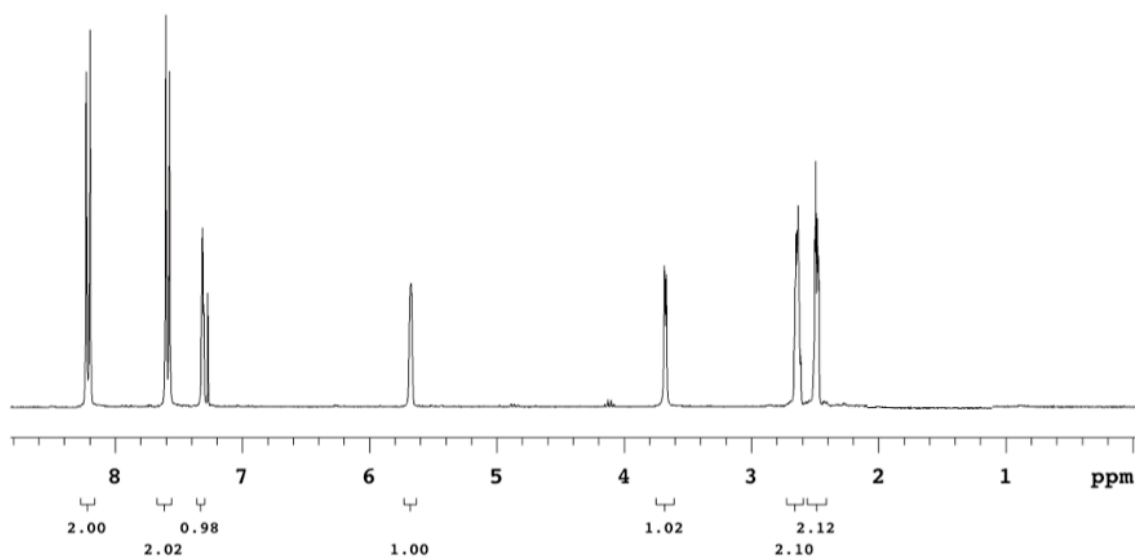

$^{13}\text{C}$  NMR ( $\text{CDCl}_3$ , 75 MHz)

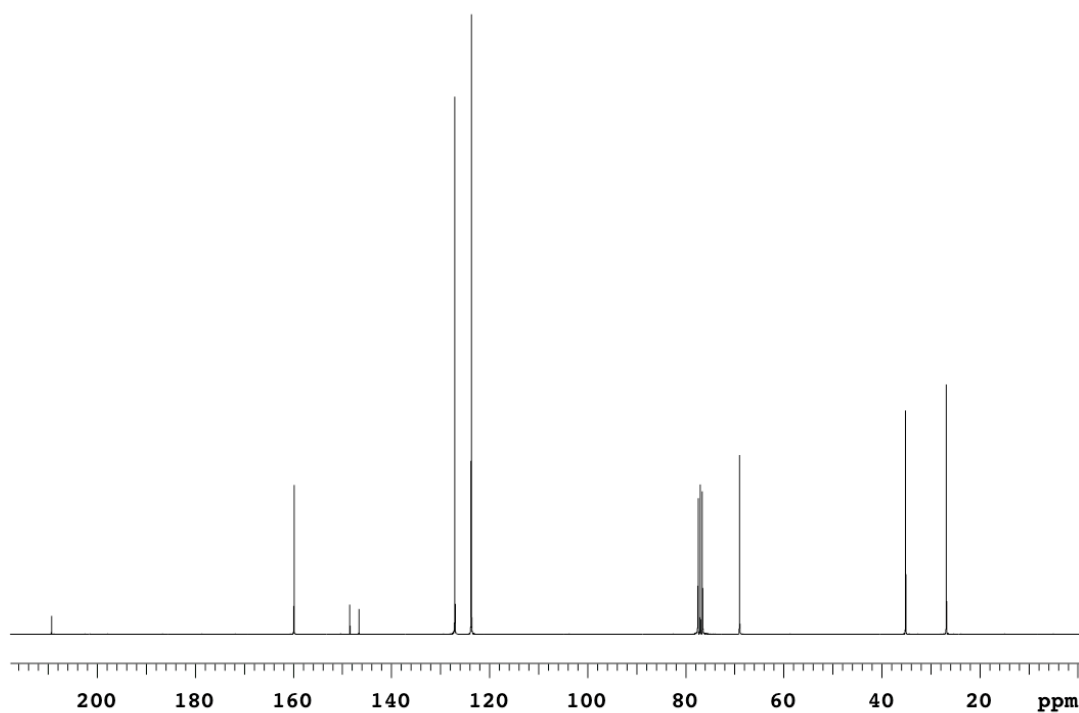

Supplementary Information

S-13

$^1\text{H}$  NMR ( $\text{CDCl}_3$ , 300 MHz)

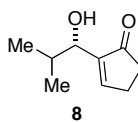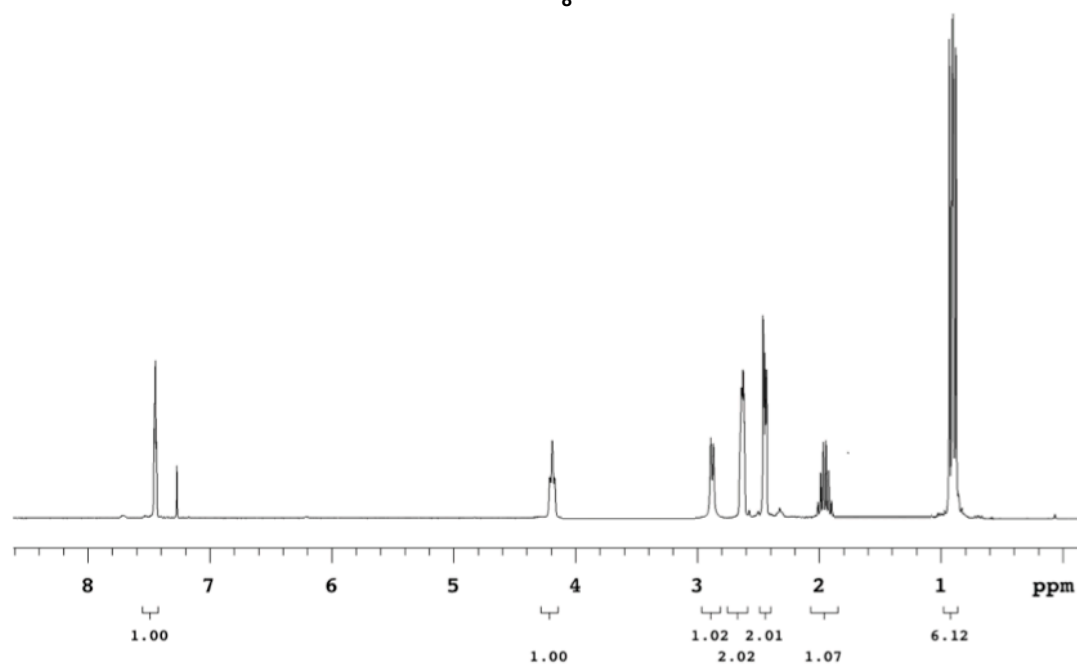

$^{13}\text{C}$  NMR ( $\text{CDCl}_3$ , 75 MHz)

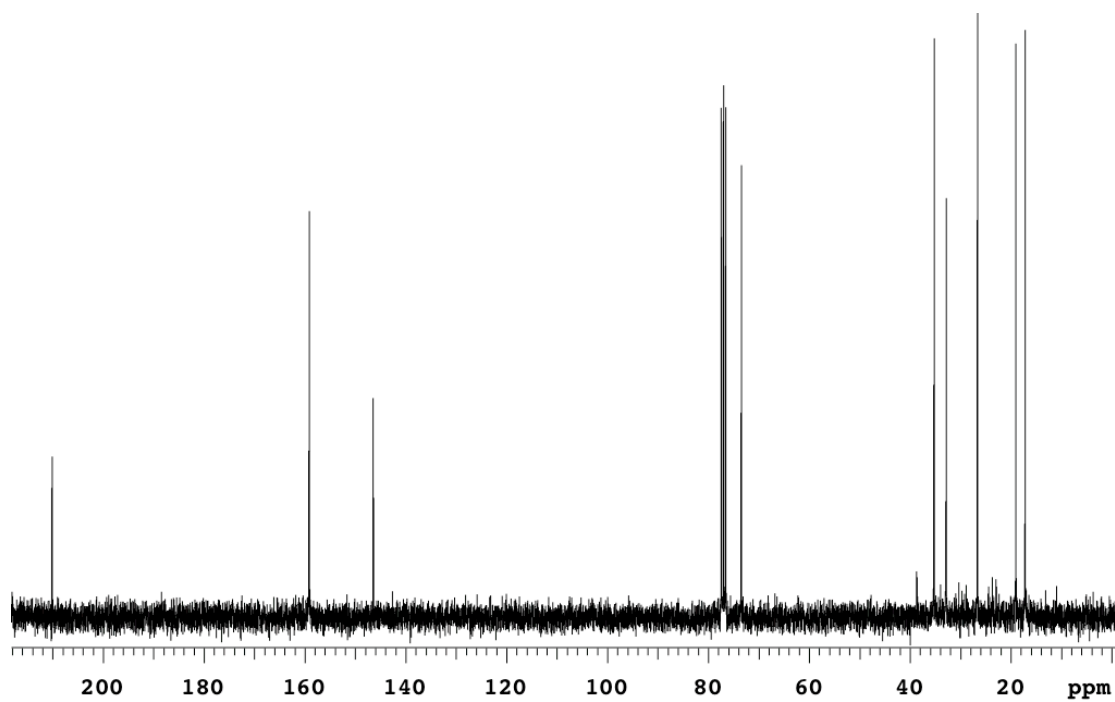

Supplementary Information

S-14

$^1\text{H}$  NMR ( $\text{CDCl}_3$ , 300 MHz)

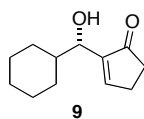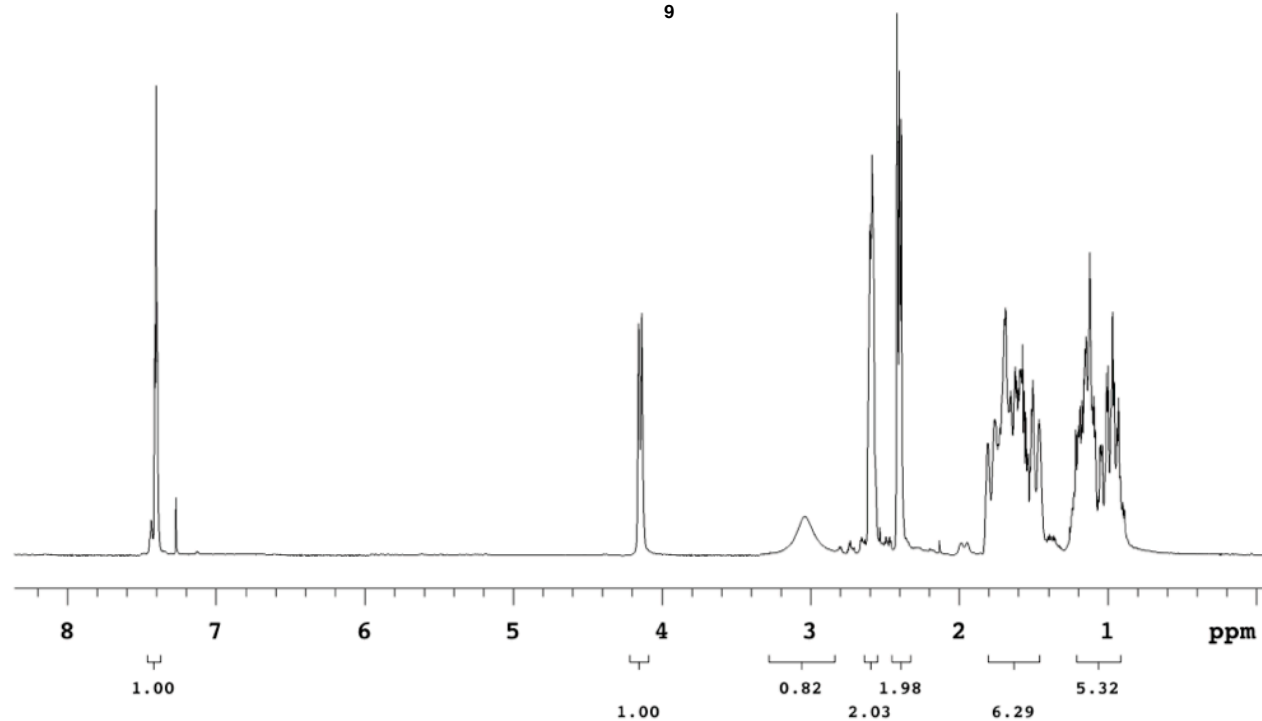

$^{13}\text{C}$  NMR ( $\text{CDCl}_3$ , 75 MHz)

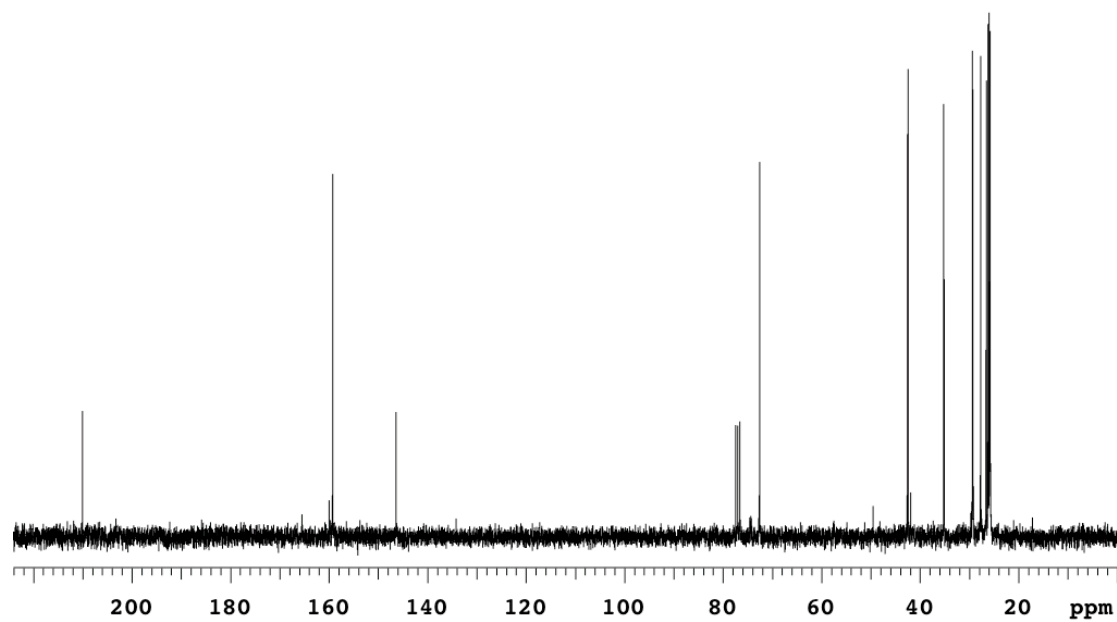

Supplementary Information

S-15

$^1\text{H}$  NMR ( $\text{CDCl}_3$ , 300 MHz)

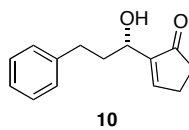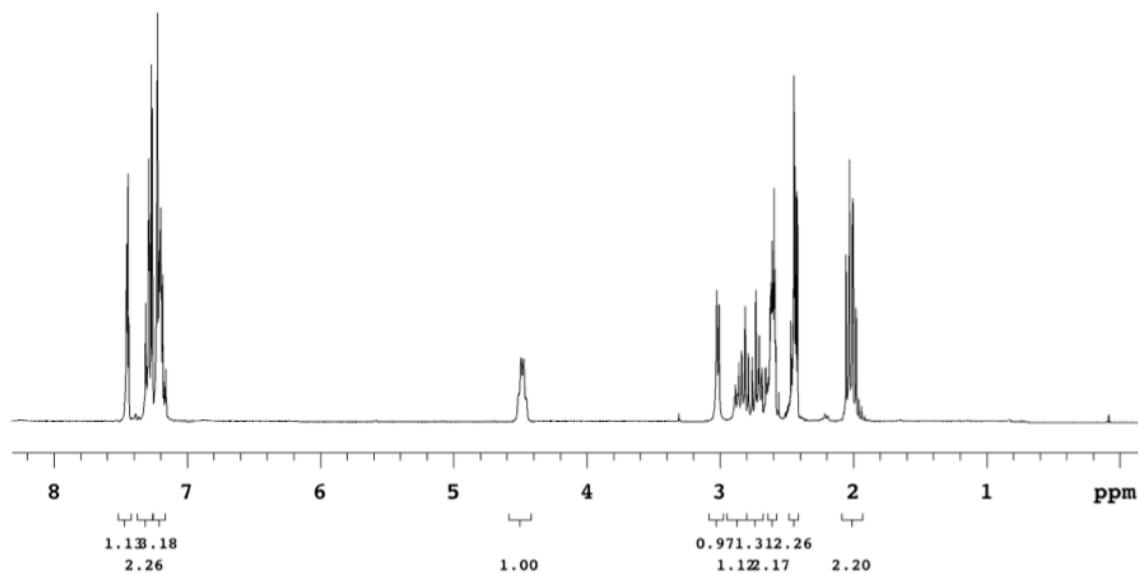

$^{13}\text{C}$  NMR ( $\text{CDCl}_3$ , 75 MHz)

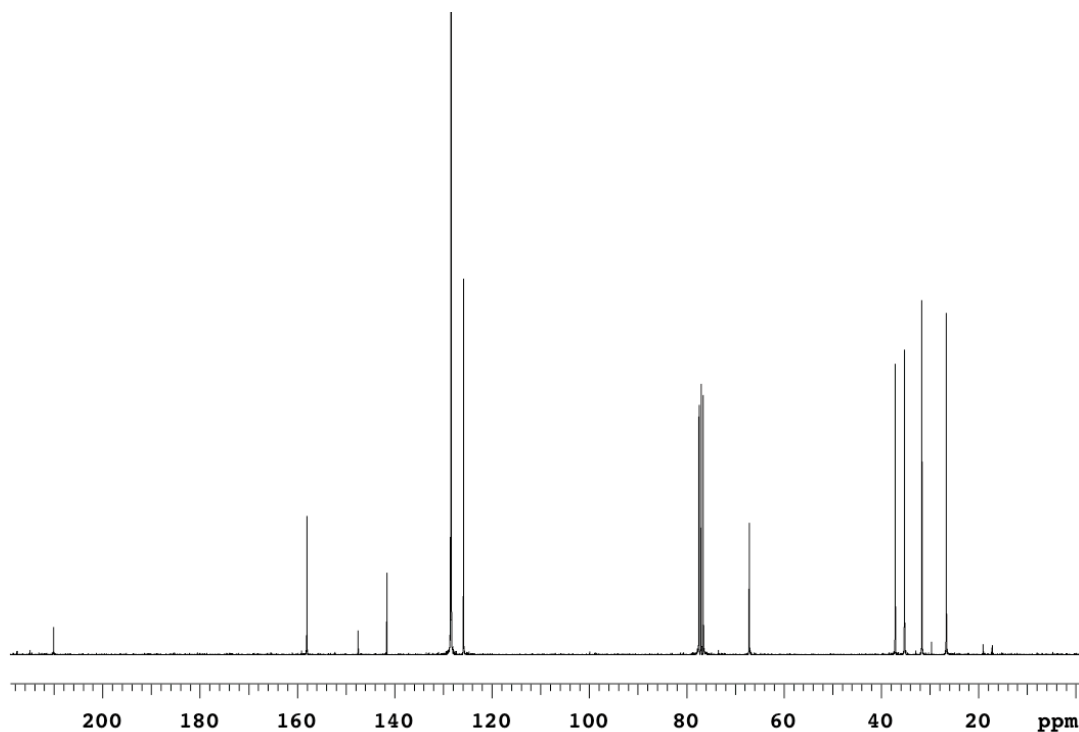

Supplement: c001977a.pdf [file c001977a.pdf]
